# Supplementary material
Source: publisher figshare collection journal article supplement (https://springernature.figshare.com/articles/dataset/_/23283086)

Western blot

Gfat1

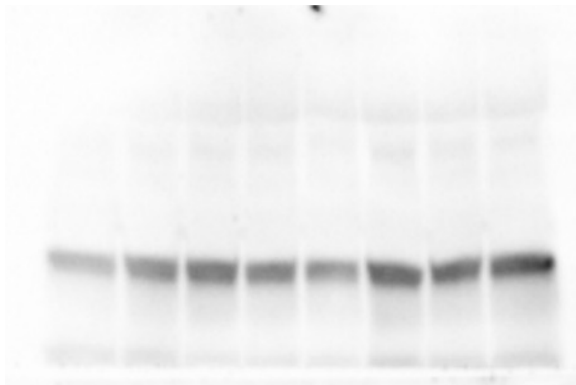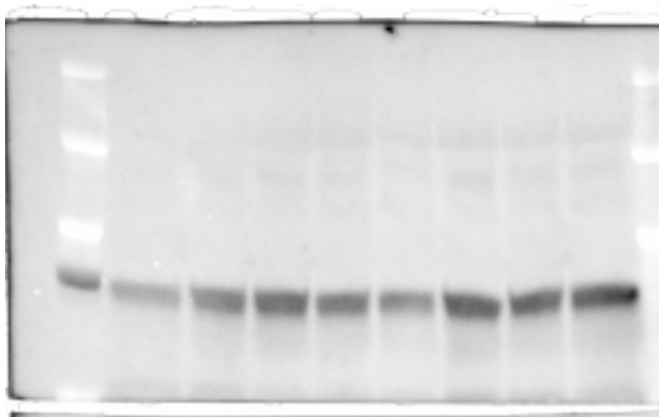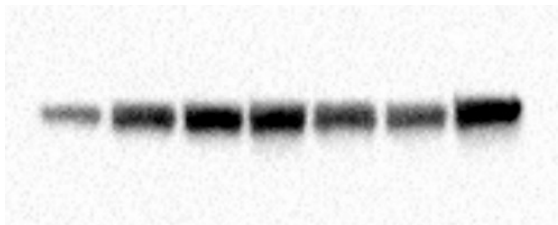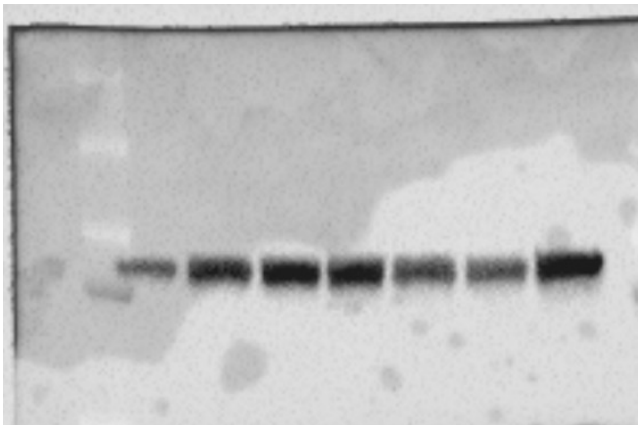

Gapdh

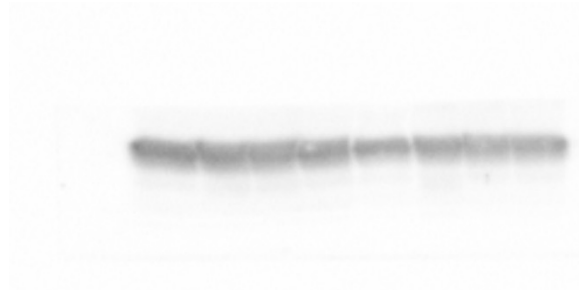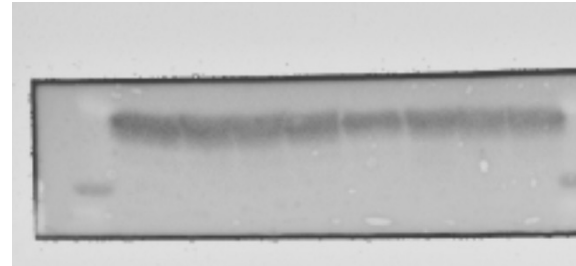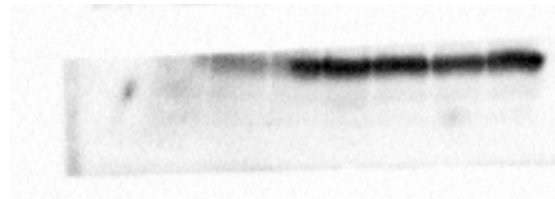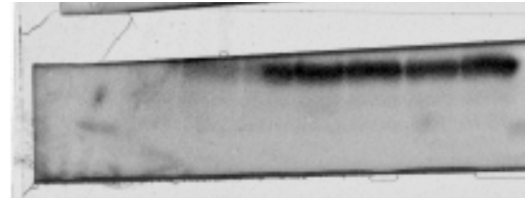

Gfat2

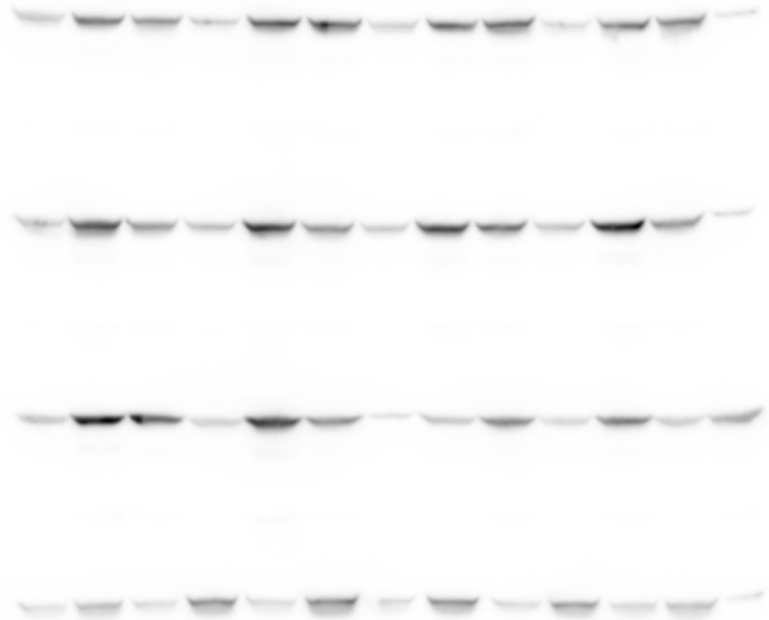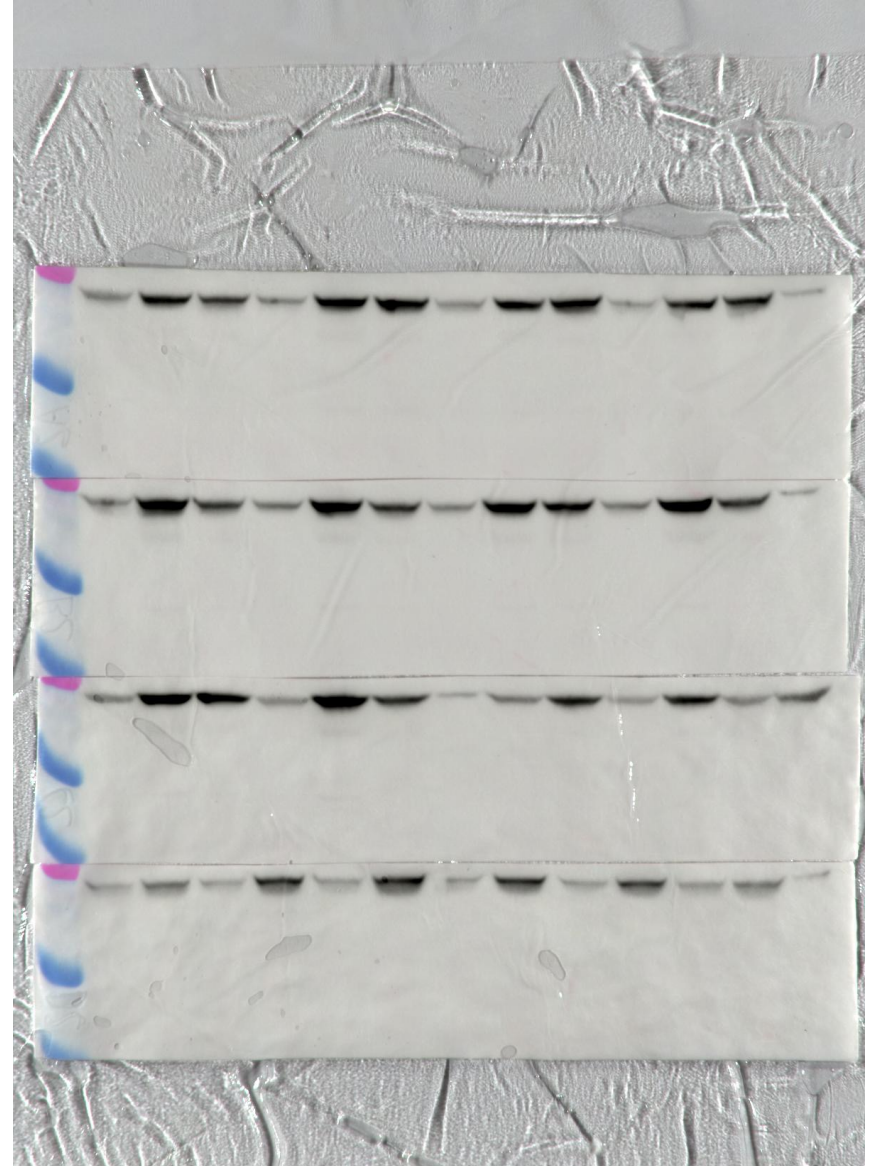

O-GlcNAc  
proteins

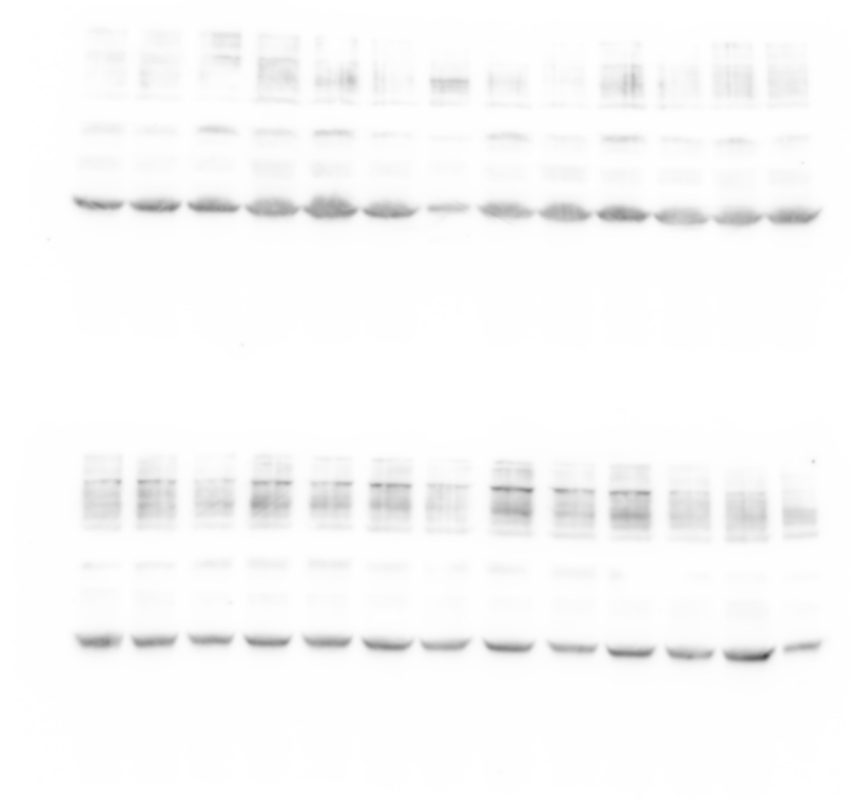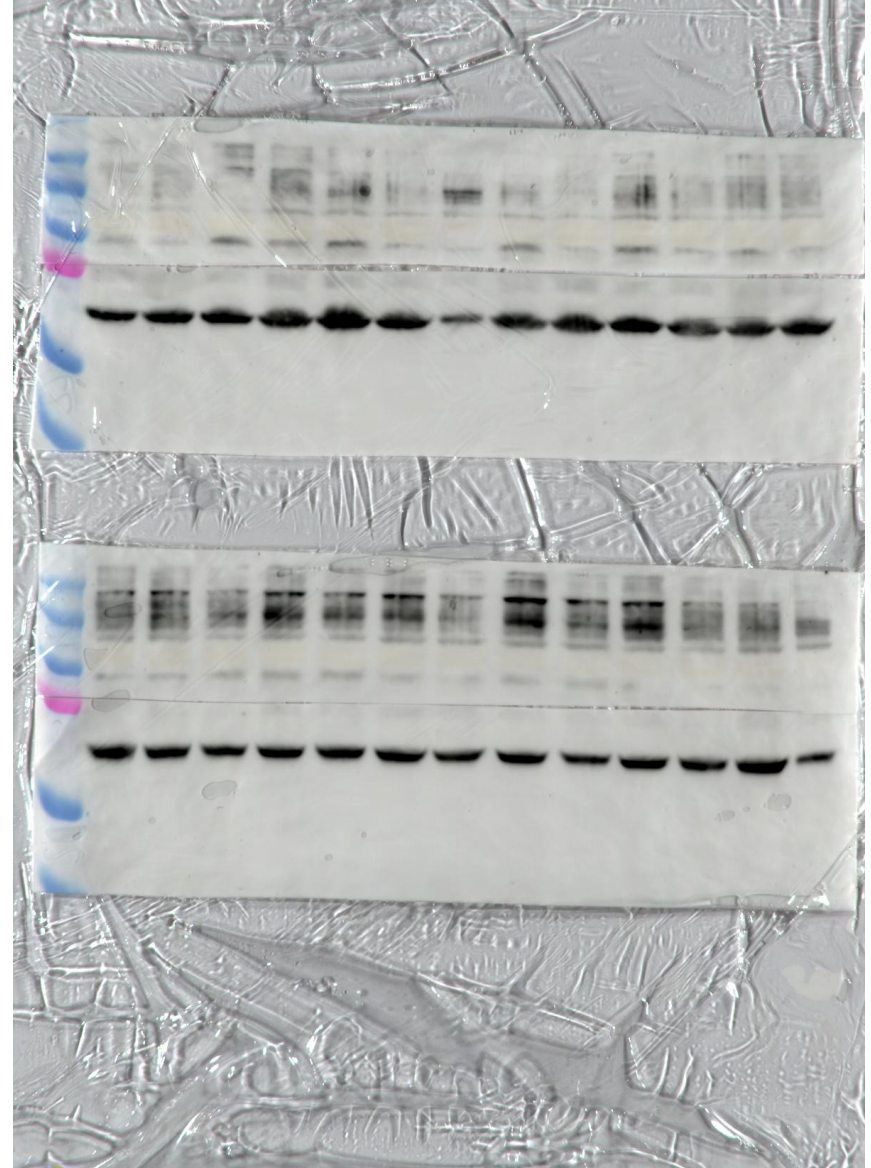

Gapdh

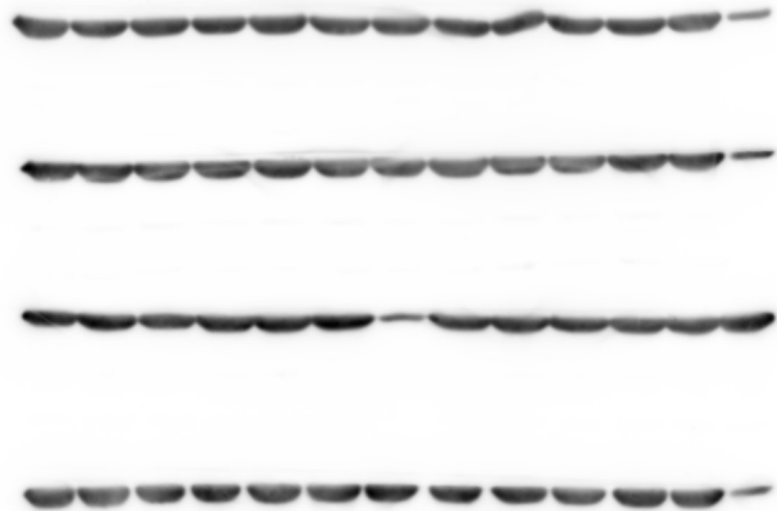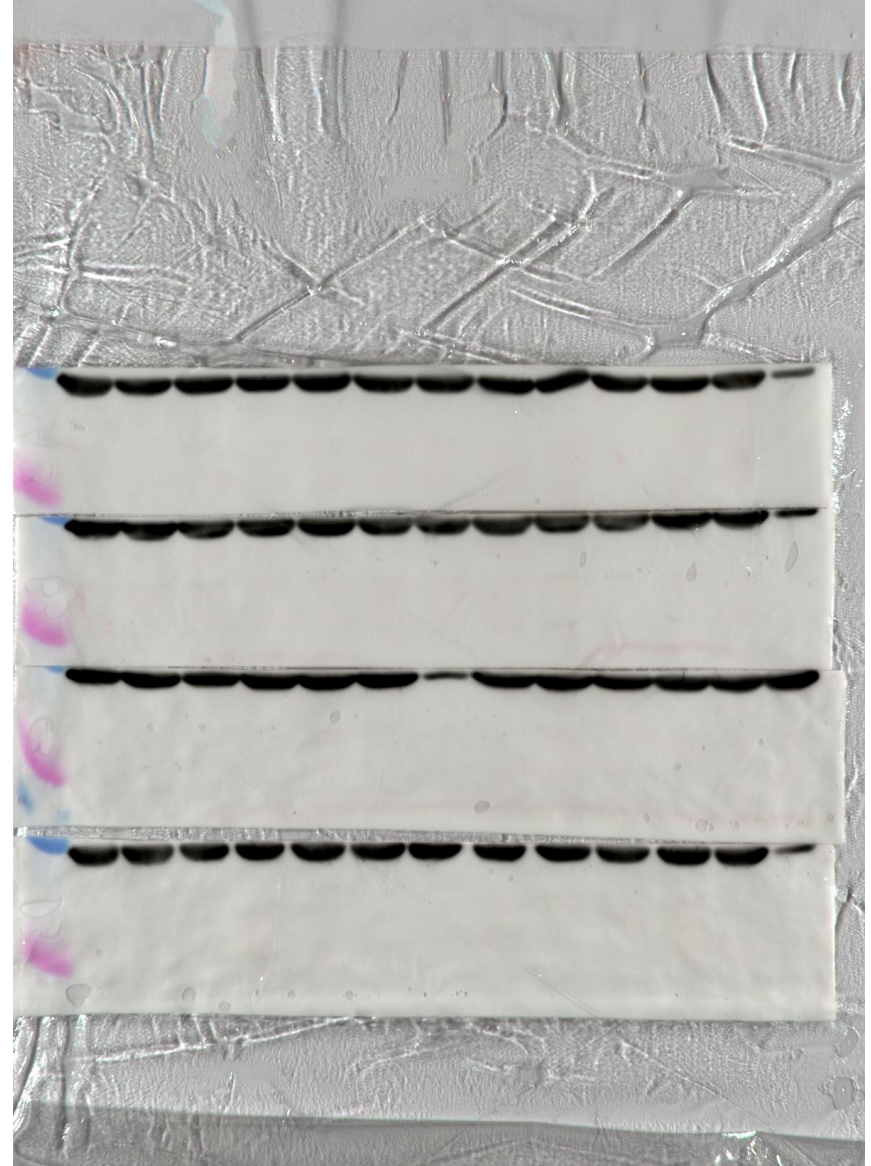

Supplement: Supplementary file 1 [file 1]
